# Supplementary material for: Relationships among Food Group Intakes, Household Expenditure, and Education Attainment in a General Japanese Population: NIPPON DATA2010
Source: PubMed Central journal article supplement (PMC5825688; doi:10.2188/jea.je20170248), 2018-03-05
Supplement: je-28-S023-s001.pdf [file je-28-S023-s001.pdf]

**eTable 1.** Number (%) of participants by household income: NIPPON DATA2010

| Age, years |       | Household income |        |                 |        |                |        |       |         |
|------------|-------|------------------|--------|-----------------|--------|----------------|--------|-------|---------|
|            |       | <2 million Yen   |        | 2–6 million Yen |        | ≥6 million Yen |        | Total |         |
| Men        | <65   | 89               | (14.9) | 344             | (57.6) | 164            | (27.5) | 597   | (100.0) |
|            | ≥65   | 119              | (23.6) | 319             | (63.3) | 66             | (13.1) | 504   | (100.0) |
|            | Total | 208              | (18.9) | 663             | (60.2) | 230            | (20.9) | 1101  | (100.0) |
| Women      | <65   | 118              | (13.6) | 503             | (57.9) | 248            | (28.5) | 869   | (100.0) |
|            | ≥65   | 205              | (34.9) | 328             | (55.8) | 55             | (9.4)  | 588   | (100.0) |
|            | Total | 323              | (22.2) | 831             | (57.0) | 303            | (20.8) | 1457  | (100.0) |

n (%)

**eTable 2. Relationships among food intakes and household income: NIPPON DATA2010**

|            | Age, years | Men                           |                       |                |           |                       | Women                         |                          |                        |          |                       |                  |        |
|------------|------------|-------------------------------|-----------------------|----------------|-----------|-----------------------|-------------------------------|--------------------------|------------------------|----------|-----------------------|------------------|--------|
|            |            | Household income <sup>a</sup> |                       |                |           | <i>p</i> <sup>d</sup> | Household income <sup>a</sup> |                          |                        |          | <i>p</i> <sup>d</sup> |                  |        |
|            |            | <2 million yen                | 2–6 million yen       | ≥6 million yen | Total     |                       | <2 million yen                | 2–6 million yen          | ≥6 million yen         | Total    |                       |                  |        |
| Cereals    | <65        | 261 (83) <sup>*c</sup>        | 250 (72)              | 243 (73)       | 250 (74)  | Household income      | <0.001                        | 221 (65)                 | 225 (77) <sup>*c</sup> | 213 (63) | 221 (72)              | Household income | <0.001 |
|            | ≥65        | 262 (81) <sup>*b,c</sup>      | 238 (65)              | 235 (72)       | 243 (71)  | Age                   | 0.586                         | 237 (71) <sup>*b,c</sup> | 227 (66) <sup>*c</sup> | 209 (64) | 229 (68)              | Age              | 0.018  |
|            | Total      | 261 (82) <sup>*b,c</sup>      | 244 (69)              | 241 (73)       | 247 (73)  | Interaction           | 0.476                         | 231 (70) <sup>*c</sup>   | 225 (73) <sup>*c</sup> | 212 (63) | 224 (70)              | Interaction      | 0.031  |
| Potatoes   | <65        | 25 (30)                       | 26 (31)               | 26 (31)        | 26 (30)   | Household income      | 0.987                         | 31 (38)                  | 30 (36)                | 28 (34)  | 29 (36)               | Household income | 0.088  |
|            | ≥65        | 28 (36)                       | 30 (35)               | 31 (32)        | 30 (35)   | Age                   | 0.032                         | 41 (47) <sup>*b</sup>    | 34 (35)                | 33 (38)  | 37 (40)               | Age              | 0.004  |
|            | Total      | 27 (34)                       | 28 (33)               | 27 (31)        | 28 (33)   | Interaction           | 1.000                         | 37 (44)                  | 32 (36)                | 29 (35)  | 32 (38)               | Interaction      | 0.376  |
| Soy        | <65        | 33 (40)                       | 29 (41)               | 29 (35)        | 30 (40)   | Household income      | 0.641                         | 28 (37)                  | 35 (42)                | 35 (41)  | 34 (41)               | Household income | 0.109  |
|            | ≥65        | 39 (47)                       | 37 (39)               | 33 (36)        | 37 (40)   | Age                   | 0.055                         | 42 (45)                  | 41 (40)                | 42 (35)  | 42 (41)               | Age              | 0.009  |
|            | Total      | 36 (44)                       | 33 (40)               | 30 (35)        | 33 (40)   | Interaction           | 0.884                         | 37 (43)                  | 37 (41)                | 37 (40)  | 37 (41)               | Interaction      | 0.606  |
| Vegetables | <65        | 138 (99)                      | 132 (77)              | 144 (77)       | 136 (80)  | Household income      | 0.393                         | 152 (96)                 | 157 (92)               | 166 (89) | 159 (92)              | Household income | 0.275  |
|            | ≥65        | 149 (106)                     | 168 (84)              | 166 (86)       | 163 (90)  | Age                   | <0.001                        | 197 (104)                | 193 (102)              | 189 (99) | 194 (103)             | Age              | <0.001 |
|            | Total      | 144 (103)                     | 149 (82)              | 151 (80)       | 149 (86)  | Interaction           | 0.169                         | 181 (103)                | 171 (98)               | 170 (91) | 173 (98)              | Interaction      | 0.851  |
| Fruit      | <65        | 40 (53)                       | 36 (52)               | 36 (51)        | 36 (52)   | Household income      | 0.291                         | 70 (82)                  | 66 (72)                | 60 (71)  | 65 (73)               | Household income | 0.921  |
|            | ≥65        | 65 (63) <sup>*b</sup>         | 78 (66)               | 74 (63)        | 74 (65)   | Age                   | <0.001                        | 99 (77)                  | 92 (75)                | 83 (74)  | 94 (76)               | Age              | <0.001 |
|            | Total      | 54 (60)                       | 56 (63)               | 47 (57)        | 54 (61)   | Interaction           | 0.193                         | 89 (80)                  | 76 (74)                | 64 (72)  | 77 (76)               | Interaction      | 0.863  |
| Fish       | <65        | 40 (38)                       | 40 (36)               | 33 (32)        | 38 (36)   | Household income      | 0.948                         | 47 (44)                  | 40 (38)                | 38 (35)  | 41 (38)               | Household income | 0.617  |
|            | ≥65        | 55 (40)                       | 50 (38)               | 53 (43)        | 51 (39)   | Age                   | <0.001                        | 50 (38)                  | 47 (44)                | 45 (42)  | 48 (42)               | Age              | 0.189  |
|            | Total      | 49 (40)                       | 45 (38)               | 39 (37)        | 44 (38)   | Interaction           | 0.164                         | 49 (40)                  | 43 (40)                | 40 (37)  | 43 (40)               | Interaction      | 0.410  |
| Meat       | <65        | 35 (31) <sup>*b,c</sup>       | 47 (35)               | 53 (35)        | 47 (35)   | Household income      | 0.002                         | 37 (32)                  | 45 (36)                | 46 (32)  | 44 (35)               | Household income | 0.049  |
|            | ≥65        | 29 (32)                       | 29 (24)               | 37 (31)        | 30 (27)   | Age                   | <0.001                        | 28 (27)                  | 32 (28)                | 38 (29)  | 31 (28)               | Age              | <0.001 |
|            | Total      | 32 (32) <sup>*c</sup>         | 38 (31) <sup>*3</sup> | 48 (34)        | 39 (32)   | Interaction           | 0.058                         | 31 (29)                  | 40 (34)                | 45 (31)  | 39 (33)               | Interaction      | 0.539  |
| Eggs       | <65        | 17 (18)                       | 18 (16)               | 17 (16)        | 18 (16)   | Household income      | 0.697                         | 20 (20)                  | 20 (19)                | 19 (17)  | 20 (19)               | Household income | 0.682  |
|            | ≥65        | 19 (19)                       | 17 (16)               | 20 (17)        | 18 (17)   | Age                   | 0.390                         | 18 (21)                  | 20 (20)                | 19 (16)  | 19 (20)               | Age              | 0.480  |
|            | Total      | 18 (18)                       | 17 (16)               | 18 (16)        | 18 (16)   | Interaction           | 0.266                         | 19 (21)                  | 20 (19)                | 19 (17)  | 20 (19)               | Interaction      | 0.569  |
| Milk       | <65        | 35 (48)                       | 35 (52)               | 46 (63)        | 38 (55)   | Household income      | 0.002                         | 60 (71)                  | 62 (72)                | 69 (73)  | 64 (72)               | Household income | 0.295  |
|            | ≥65        | 38 (63) <sup>*b,c</sup>       | 56 (59)               | 58 (70)        | 52 (61)   | Age                   | 0.019                         | 70 (78)                  | 64 (68)                | 69 (63)  | 66 (71)               | Age              | 0.820  |
|            | Total      | 37 (57) <sup>*b,c</sup>       | 45 (56)               | 49 (65)        | 44 (58)   | Interaction           | 0.102                         | 66 (76)                  | 63 (70)                | 69 (71)  | 65 (72)               | Interaction      | 0.850  |
| Alcohol    | <65        | 99 (159)                      | 100 (165)             | 123 (180)      | 106 (168) | Household income      | 0.379                         | 33 (122)                 | 28 (82)                | 39 (102) | 32 (94)               | Household income | 0.655  |
|            | ≥65        | 82 (143)                      | 94 (138)              | 83 (118)       | 90 (136)  | Age                   | 0.028                         | 13 (61)                  | 17 (54)                | 17 (54)  | 16 (57)               | Age              | 0.001  |
|            | Total      | 89 (150)                      | 97 (152)              | 112 (165)      | 99 (155)  | Interaction           | 0.477                         | 21 (89)                  | 24 (73)                | 35 (96)  | 26 (82)               | Interaction      | 0.575  |

<sup>a</sup> Means (SD) (g/1,000 kcal)

<sup>\*b</sup> Multiple comparisons compared with 2–6 million yen, *p* < 0.05

<sup>\*c</sup> Multiple comparisons compared with ≥6 million yen, *p* < 0.05

<sup>d</sup> Main effect or interaction by ANOVA, adjusted by household size
